# Supplementary material for: Novel Loss-of-Function Variants in CDC14A are Associated with Recessive Sensorineural Hearing Loss in Iranian and Pakistani Patients
Source: PubMed Central journal article supplement (PMC6982189; doi:10.3390/ijms21010311), 2020-01-02
Supplement: ijms-21-00311-s001.pdf [file ijms-21-00311-s001.pdf]

**Supplementary Table S1:** List of analyzed HL associated genes and their corresponding OMIM numbers.

| <b>Gene</b>     | <b>OMIM number</b> |
|-----------------|--------------------|
| <i>ABHD12</i>   | 613599             |
| <i>ACTG1</i>    | 102560             |
| <i>ADCY1</i>    | 103072             |
| <i>ADGRV1</i>   | 602851             |
| <i>AIFM1</i>    | 300169             |
| <i>ARSG</i>     | 610008             |
| <i>ATP1A3</i>   | 182350             |
| <i>ATP2B2</i>   | 108733             |
| <i>BDP1</i>     | 607012             |
| <i>BSND</i>     | 606412             |
| <i>BTB</i>      | 609019             |
| <i>CABP2</i>    | 607314             |
| <i>CCDC50</i>   | 611051             |
| <i>CD164</i>    | 603356             |
| <i>CDC14A</i>   | 603504             |
| <i>CDH23</i>    | 605516             |
| <i>CEACAM16</i> | 614591             |
| <i>CEP250</i>   | 609689             |
| <i>CEP78</i>    | 617110             |
| <i>CHD7</i>     | 608892             |
| <i>CHST3</i>    | 603799             |
| <i>CIB2</i>     | 605564             |
| <i>CISD2</i>    | 611507             |
| <i>CLDN14</i>   | 605608             |
| <i>CLIC5</i>    | 607293             |
| <i>CLPP</i>     | 601119             |
| <i>CLRN1</i>    | 606397             |
| <i>COCH</i>     | 603196             |
| <i>COL11A1</i>  | 120280             |
| <i>COL11A2</i>  | 120290             |
| <i>COL2A1</i>   | 120140             |
| <i>COL4A3</i>   | 120070             |
| <i>COL4A4</i>   | 120131             |
| <i>COL4A5</i>   | 303630             |
| <i>COL4A6</i>   | 303631             |
| <i>COL9A1</i>   | 120210             |
| <i>COL9A2</i>   | 120260             |
| <i>COL9A3</i>   | 120270             |
| <i>CRYM</i>     | 123740             |
| <i>DCDC2</i>    | 605755             |
| <i>DIABLO</i>   | 605219             |
| <i>DIAPH1</i>   | 602121             |
| <i>DIAPH3</i>   | 614567             |
| <i>DMXL2</i>    | 612186             |
| <i>EDN3</i>     | 131242             |
| <i>EDNRB</i>    | 131244             |
| <i>ELMOD3</i>   | 615427             |

|                 |        |
|-----------------|--------|
| <i>EPS8</i>     | 600206 |
| <i>EPS8L2</i>   | 614988 |
| <i>ERAL1</i>    | 607435 |
| <i>ESPN</i>     | 606351 |
| <i>ESRP1</i>    | 612959 |
| <i>ESRRB</i>    | 602167 |
| <i>EYA1</i>     | 601653 |
| <i>EYA4</i>     | 603550 |
| <i>FAM65B</i>   | 611410 |
| <i>FGF3</i>     | 164950 |
| <i>FGFR1</i>    | 136350 |
| <i>FGFR2</i>    | 176943 |
| <i>FITM2</i>    | 612029 |
| <i>FOXI1</i>    | 601093 |
| <i>GAB1</i>     | 604439 |
| <i>GATA3</i>    | 131320 |
| <i>GIPC3</i>    | 608792 |
| <i>GJB2</i>     | 121011 |
| <i>GJB3</i>     | 603324 |
| <i>GJB6</i>     | 604418 |
| <i>GPSM2</i>    | 609245 |
| <i>GRHL2</i>    | 608576 |
| <i>GRXCR1</i>   | 613283 |
| <i>GRXCR2</i>   | 615762 |
| <i>GSDME</i>    | 608798 |
| <i>HARS</i>     | 142810 |
| <i>HARS2</i>    | 600783 |
| <i>HGF</i>      | 142409 |
| <i>HOMER2</i>   | 604799 |
| <i>HSD17B4</i>  | 601860 |
| <i>IFNLR1</i>   | 607404 |
| <i>ILDR1</i>    | 609739 |
| <i>KARS</i>     | 601421 |
| <i>KCNE1</i>    | 176261 |
| <i>KCNJ10</i>   | 602208 |
| <i>KCNQ1</i>    | 607542 |
| <i>KCNQ4</i>    | 603537 |
| <i>KIAA0391</i> | 609947 |
| <i>KIT</i>      | 164920 |
| <i>KITLG</i>    | 184745 |
| <i>KMT2D</i>    | 602113 |
| <i>LARS2</i>    | 604544 |
| <i>LHFPL5</i>   | 609427 |
| <i>LMX1A</i>    | 600298 |
| <i>LOXHD1</i>   | 613072 |
| <i>LOXL3</i>    | 607163 |
| <i>LRP5</i>     | 603506 |
| <i>LRTOMT</i>   | 612414 |
| <i>MARVELD2</i> | 610572 |
| <i>MASP1</i>    | 600521 |

|                 |        |
|-----------------|--------|
| <i>MCM2</i>     | 116945 |
| <i>MET</i>      | 164860 |
| <i>METTLL13</i> | 617987 |
| <i>MIR96</i>    | 611606 |
| <i>MITF</i>     | 156845 |
| <i>MPZL2</i>    | 604873 |
| <i>MSRB3</i>    | 613719 |
| <i>MYH14</i>    | 608568 |
| <i>MYH9</i>     | 160775 |
| <i>MYO15A</i>   | 602666 |
| <i>MYO3A</i>    | 606808 |
| <i>MYO6</i>     | 600970 |
| <i>MYO7A</i>    | 276903 |
| <i>NARS2</i>    | 612803 |
| <i>NISCH</i>    | 615507 |
| <i>OSBPL2</i>   | 606731 |
| <i>OTOA</i>     | 607038 |
| <i>OTOF</i>     | 603681 |
| <i>OTOG</i>     | 604487 |
| <i>OTOGL</i>    | 614925 |
| <i>P2RX2</i>    | 600844 |
| <i>PAX3</i>     | 606597 |
| <i>PCARE</i>    | 613425 |
| <i>PCDH15</i>   | 605514 |
| <i>PDZD7</i>    | 612971 |
| <i>PEX1</i>     | 602136 |
| <i>PEX6</i>     | 601498 |
| <i>PEX7</i>     | 601757 |
| <i>PHYH</i>     | 602026 |
| <i>PJVK</i>     | 610219 |
| <i>PNPT1</i>    | 610316 |
| <i>POLD1</i>    | 174761 |
| <i>POU3F4</i>   | 300039 |
| <i>POU4F3</i>   | 602460 |
| <i>PRPS1</i>    | 311850 |
| <i>PTPN11</i>   | 176876 |
| <i>PTPRQ</i>    | 603317 |
| <i>RDX</i>      | 179410 |
| <i>REST</i>     | 600571 |
| <i>ROR1</i>     | 602336 |
| <i>S1PR2</i>    | 605111 |
| <i>SERPINB6</i> | 173321 |
| <i>SGO2</i>     | 612425 |
| <i>SIX1</i>     | 601205 |
| <i>SIX5</i>     | 600963 |
| <i>SLC17A8</i>  | 607557 |
| <i>SLC22A4</i>  | 604190 |
| <i>SLC26A4</i>  | 605646 |
| <i>SLC26A5</i>  | 604943 |
| <i>SLC44A4</i>  | 606107 |

|                 |        |
|-----------------|--------|
| <i>SLC7A8</i>   | 604235 |
| <i>SMPX</i>     | 300226 |
| <i>SNAI2</i>    | 602150 |
| <i>SOX10</i>    | 602229 |
| <i>STRC</i>     | 606440 |
| <i>SYNE4</i>    | 615535 |
| <i>TBC1D24</i>  | 613577 |
| <i>TBX1</i>     | 602054 |
| <i>TECTA</i>    | 602574 |
| <i>TIMM8A</i>   | 300356 |
| <i>TJP2</i>     | 607709 |
| <i>TMC1</i>     | 606706 |
| <i>TMEM132E</i> | 616178 |
| <i>TMIE</i>     | 607237 |
| <i>TMPRSS3</i>  | 605511 |
| <i>TMTC2</i>    | 615856 |
| <i>TNC</i>      | 187380 |
| <i>TPRN</i>     | 613354 |
| <i>TRIOBP</i>   | 609761 |
| <i>TSPEAR</i>   | 612920 |
| <i>TWNK</i>     | 606075 |
| <i>USH1C</i>    | 605242 |
| <i>USH1G</i>    | 607696 |
| <i>USH2A</i>    | 608400 |
| <i>WBP2</i>     | 606962 |
| <i>WFS1</i>     | 606201 |
| <i>WHRN</i>     | 607928 |

**Supplementary Table S2:** Extended statistical information for quantification of RT-qPCR expression values in Figure 3.

| <b>Pairwise comparison</b> | <b>Exon 2-3</b> | <b>Exon 11-12</b> |
|----------------------------|-----------------|-------------------|
| Control 1 – Control 2      | n.s.            | n.s.              |
| Control 1 – Control 3      | p < 0.05        | n.s.              |
| Control 1 – I.2            | p < 0.001       | p < 0.001         |
| Control 1 – II.2           | p < 0.001       | p < 0.001         |
| Control 2 – Control 3      | n.s.            | n.s.              |
| Control 2 – I.2            | p < 0.01        | p < 0.001         |
| Control 2 – II.2           | p < 0.001       | p < 0.001         |
| Control 3 – I.2            | p < 0.05        | p < 0.001         |
| Control 3 – II.2           | p < 0.001       | p < 0.001         |
| I.2 – II.2                 | p < 0.001       | p < 0.01          |

Results of post-hoc pairwise comparisons with Bonferroni's correction for multiple comparisons are shown for exon 2-3 and exon 11-12.

*Abbreviations: n.s. = not significant*
